# Supplementary figures and images for: Accuracy of Imputation of Microsatellite Markers from a 50K SNP Chip in Spanish Assaf Sheep
Source: MDPI journal article supplement (doi:10.3390/ani11010086), 2021-01-05

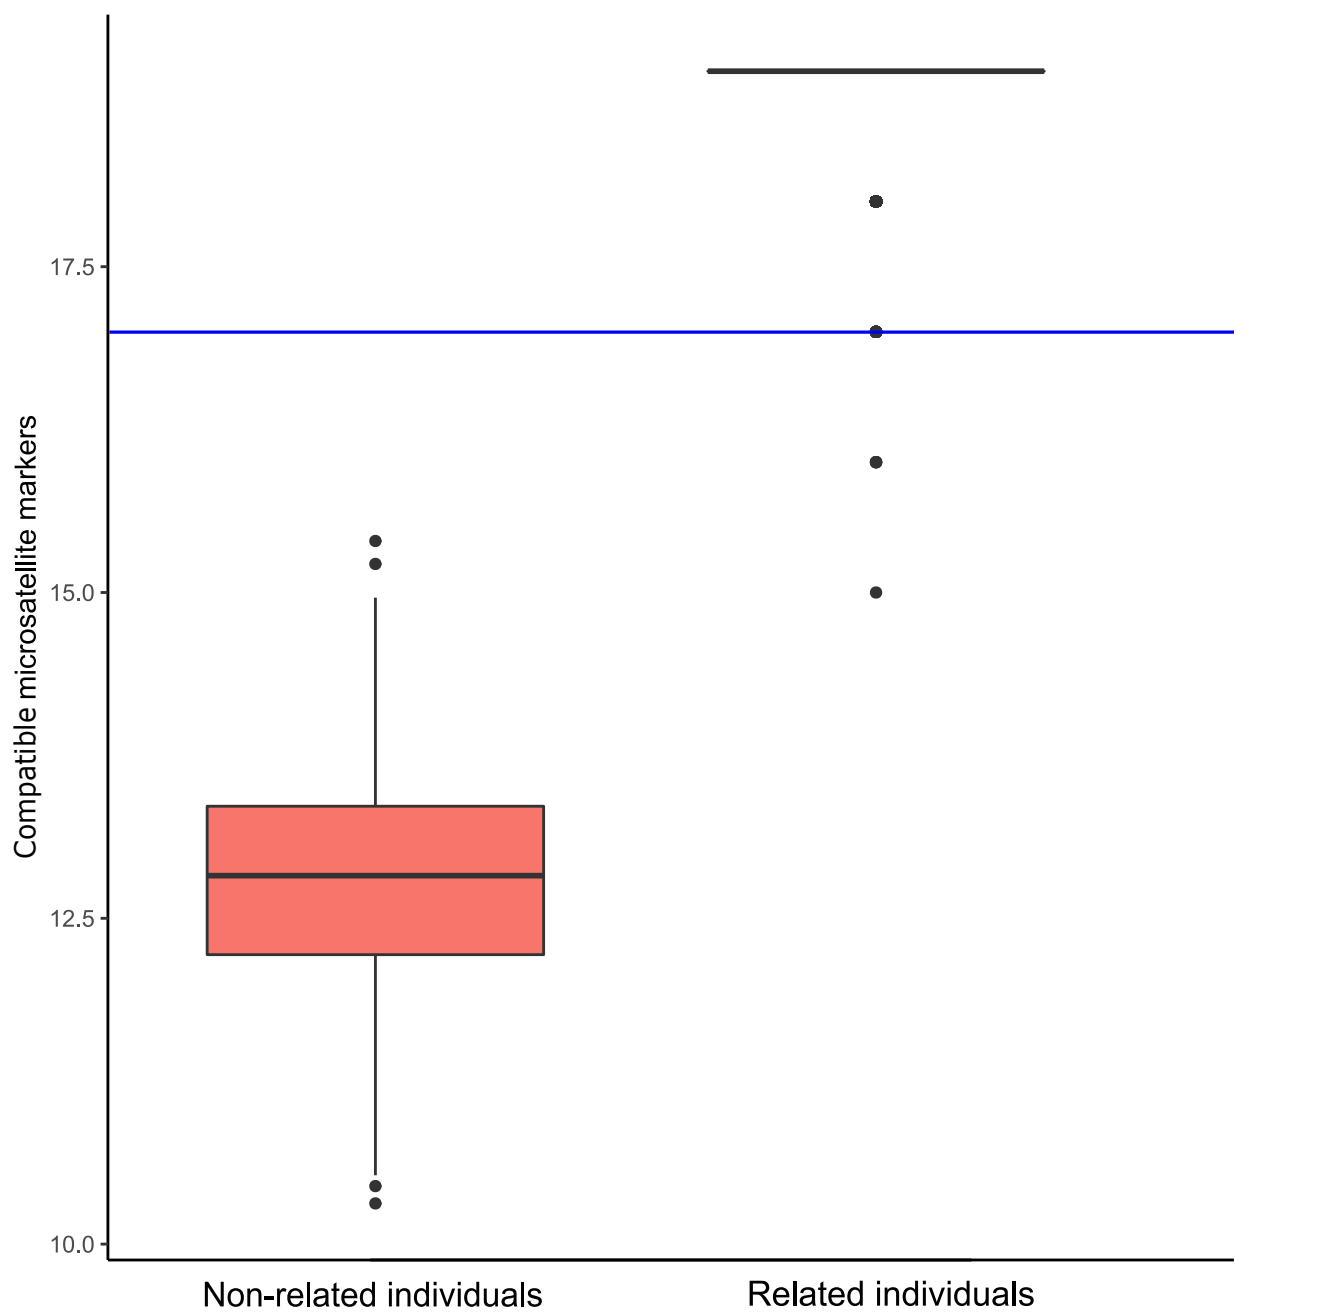

Supplement: s1 [file s1]

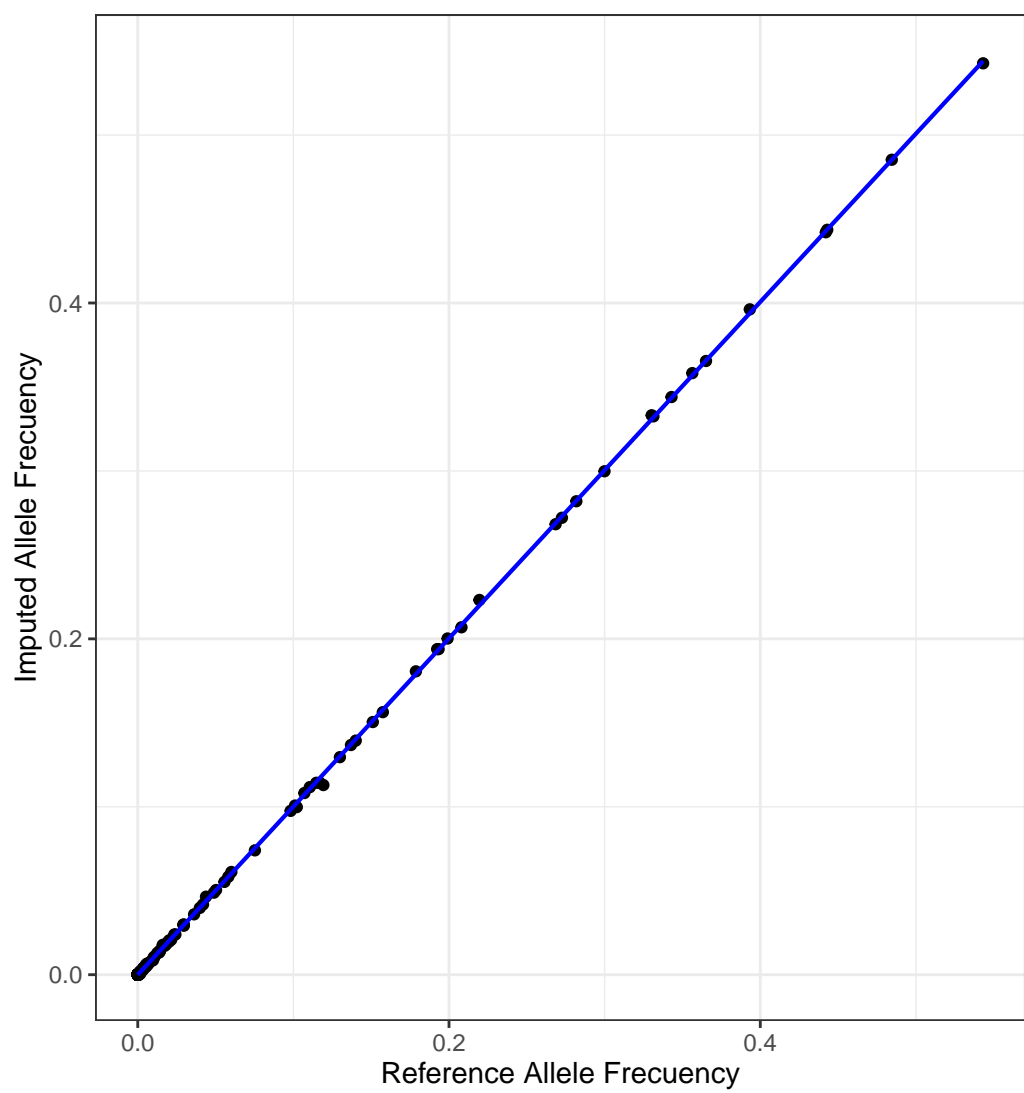

Supplement: s1 [file s1]

The colors scale:

Min = -1.39

0.00

Max = 1.39

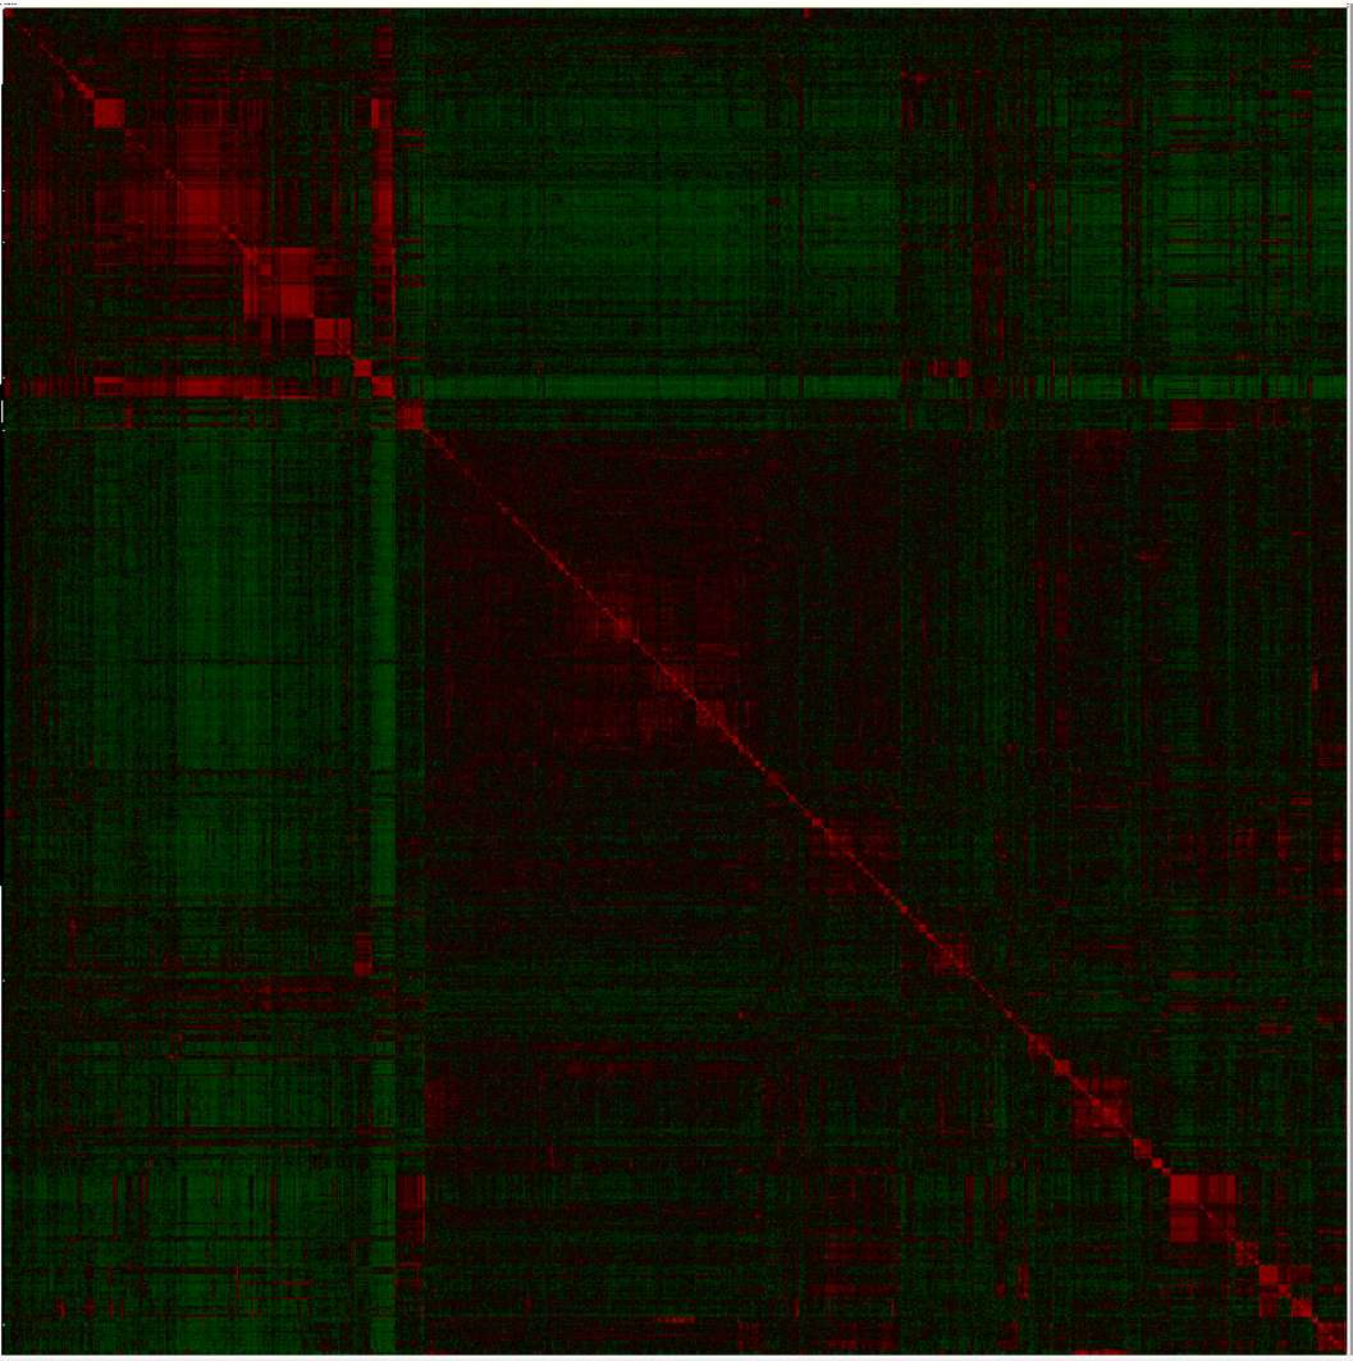

Supplement: s1 [file s1]

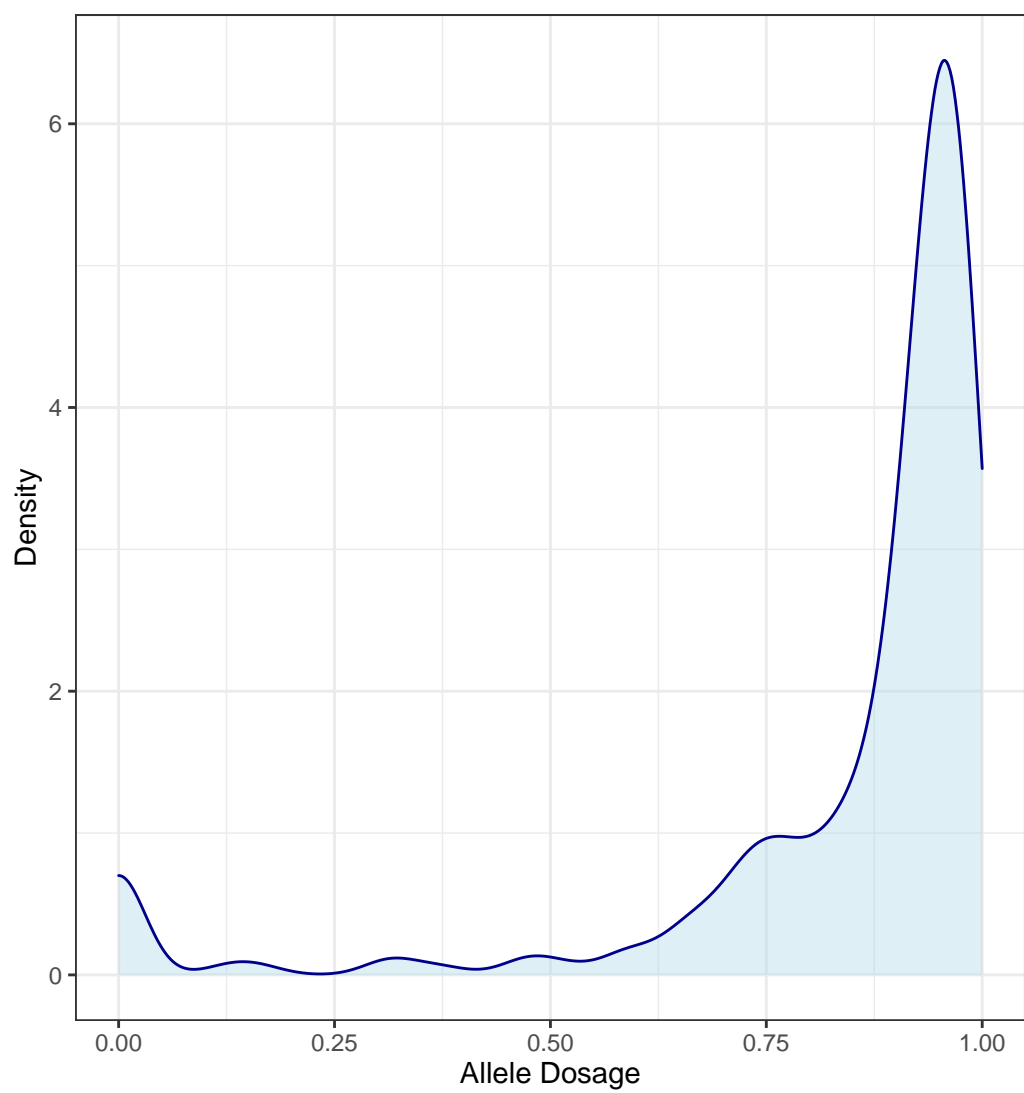

Supplement: s1 [file s1]

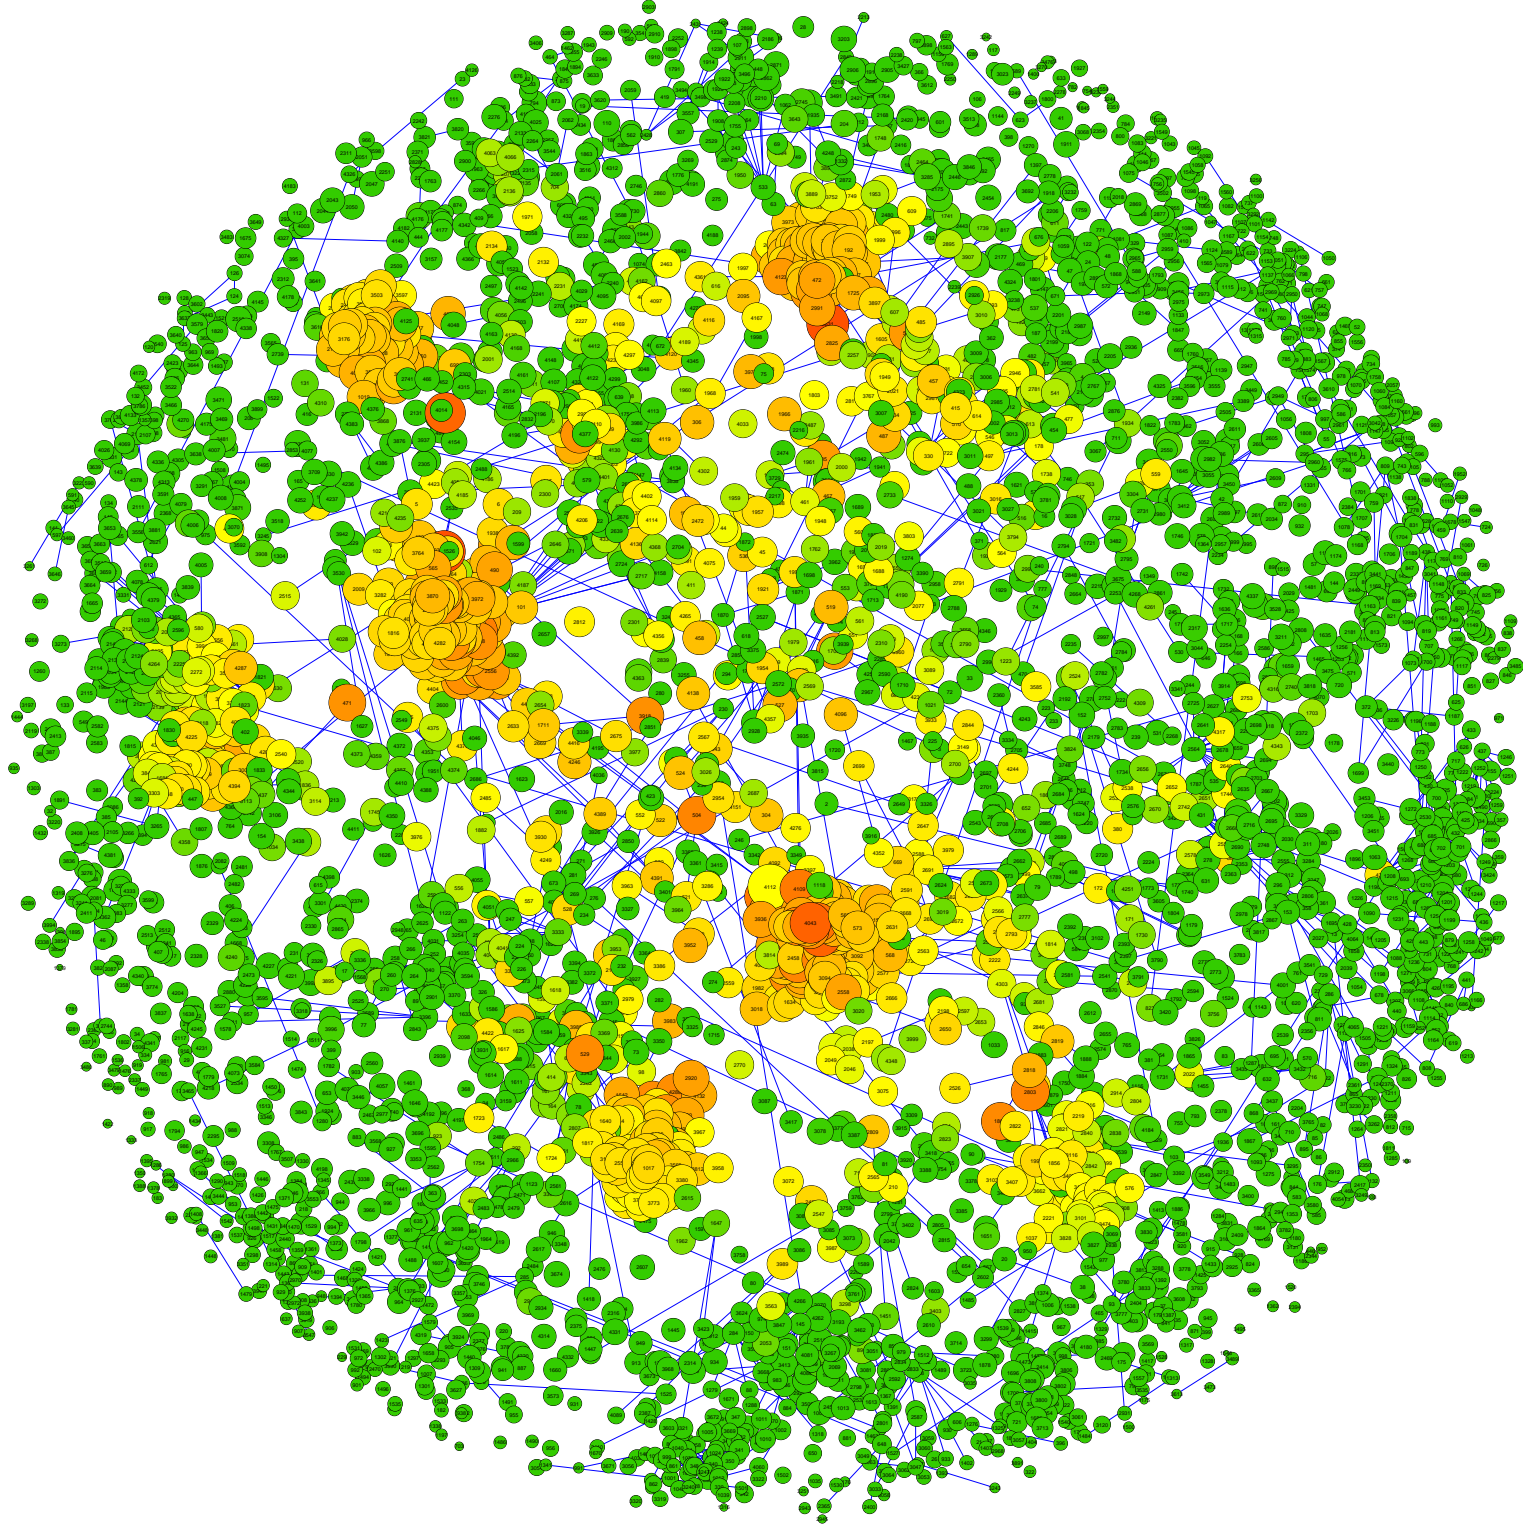

Supplement: s1 [file s1]
